# Supplementary material for: Optimization of Methylphenidate Extended-Release Chewable Tablet Dose in Children with ADHD: Open-Label Dose Optimization in a Laboratory Classroom Study
Source: PubMed Central journal article supplement — J Child Adolesc Psychopharmacol. 2018 Jun 1;28(5):314–21. doi: 10.1089/cap.2017.0138 (PMC5994665; doi:10.1089/cap.2017.0138), 2018-06-01
Supplement: Supp_Figure1.pdf [file Supp_Figure1.pdf]

## Supplementary Data

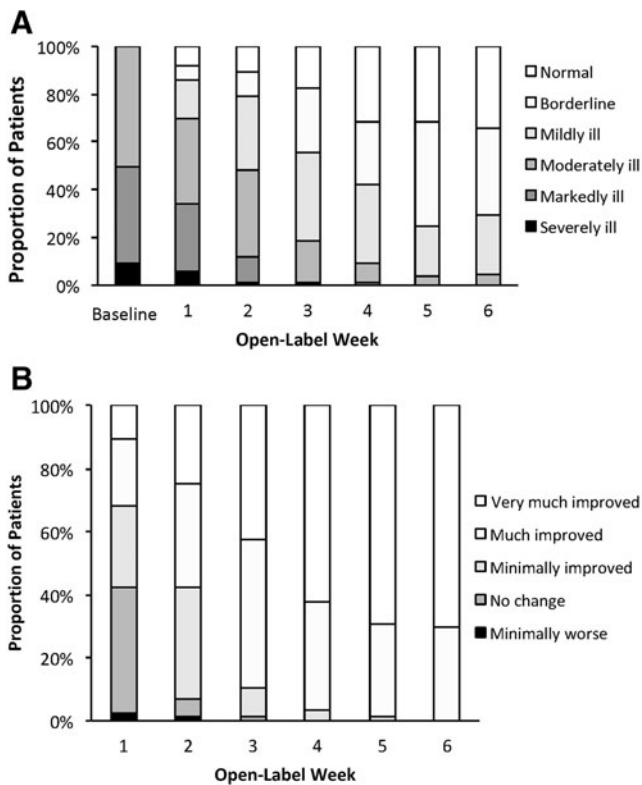

**SUPPLEMENTARY FIG. S1.** CGI-S and CGI-I scores by open-label week, intent-to-treat population ( $N=85$ ). **(A)** Proportion of participants in each CGI-S classification. No participants scored 7 (among the most extremely ill subjects) during the study. **(B)** Proportion of participants in each CGI-I classification. No participants scored 6 (much worse) or 7 (very much worse) during the study. CGI-I, Clinical Global Impressions-Improvement; CGI-S, Clinical Global Impressions-Severity.
