# Supplementary material for: Optimization of Methylphenidate Extended-Release Chewable Tablet Dose in Children with ADHD: Open-Label Dose Optimization in a Laboratory Classroom Study
Source: PubMed Central journal article supplement — J Child Adolesc Psychopharmacol. 2018 Jun 1;28(5):314–21. doi: 10.1089/cap.2017.0138 (PMC5994665; doi:10.1089/cap.2017.0138), 2018-06-01
Supplement: Supp_Figure2.pdf [file Supp_Figure2.pdf]

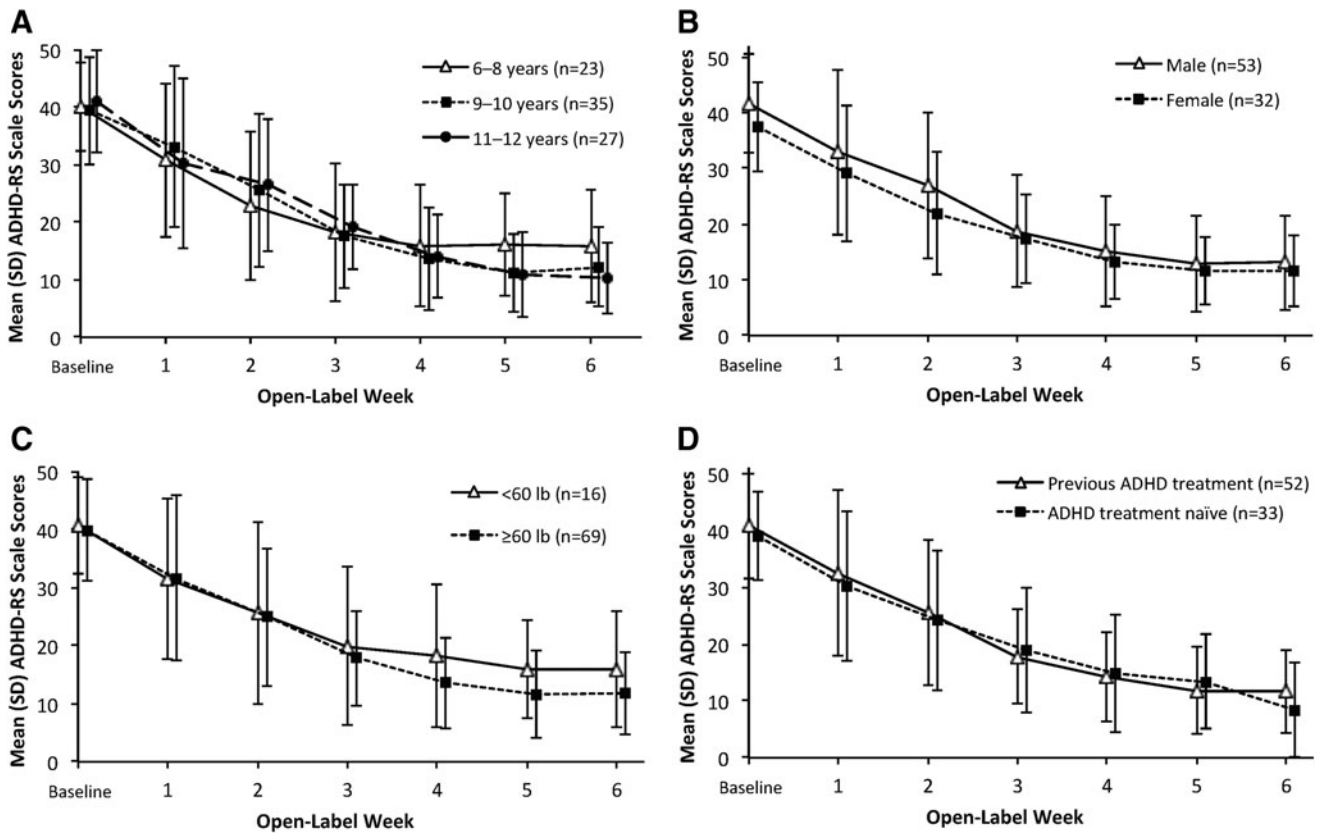

**SUPPLEMENTARY FIG. S2.** Mean (SD) ADHD-RS-IV total score by dose-optimization period open-label week, by subgroups. (A) Age groups. (B) Sex. (C) Weight groups. (D) Previous ADHD treatment. Previous ADHD treatments included medications in drug class of centrally acting sympathomimetics. ADHD, attention-deficit/hyperactivity disorder; ADHD-RS-IV, attention-deficit/hyperactivity disorder rating scale; SD, standard deviation.
