# Supplementary material for: Optimization of Methylphenidate Extended-Release Chewable Tablet Dose in Children with ADHD: Open-Label Dose Optimization in a Laboratory Classroom Study
Source: PubMed Central journal article supplement — J Child Adolesc Psychopharmacol. 2018 Jun 1;28(5):314–21. doi: 10.1089/cap.2017.0138 (PMC5994665; doi:10.1089/cap.2017.0138), 2018-06-01
Supplement: Supp_Table1.pdf [file Supp_Table1.pdf]

SUPPLEMENTARY TABLE S1. CONNERS' PARENT RATING  
SCALE, SCALE SCORES (NORMALIZED T SCORES),  
INTENT-TO-TREAT POPULATION (N=85)

| <i>CPRS scale,<br/>mean (SD)</i>   | <i>Baseline</i> | <i>OL week 6</i> | <i>Change from<br/>baseline, OL<br/>week 6</i> |
|------------------------------------|-----------------|------------------|------------------------------------------------|
| Oppositional                       | 67.3 (15.1)     | 49.8 (10.8)      | -17.5 (13.5)                                   |
| Cognitive problems/<br>inattention | 71.1 (13.3)     | 54.0 (11.5)      | -17.1 (13.1)                                   |
| Hyperactivity                      | 79.3 (16.2)     | 54.4 (10.6)      | -24.9 (16.8)                                   |
| Anxious/Shy                        | 57.3 (15.1)     | 47.9 (10.8)      | -9.4 (13.0)                                    |
| Perfectionism                      | 54.9 (12.8)     | 45.9 (7.6)       | -9.0 (10.9)                                    |
| Social problems                    | 57.1 (14.3)     | 50.5 (10.8)      | -6.6 (11.6)                                    |
| Psychosomatic                      | 57.1 (17.6)     | 47.2 (9.9)       | -9.9 (14.9)                                    |
| ADHD index                         | 73.8 (11.0)     | 52.9 (9.8)       | -20.9 (11.5)                                   |
| Restless impulse                   | 74.6 (12.5)     | 53.2 (10.4)      | -21.4 (12.0)                                   |
| Emotional lability                 | 64.8 (15.8)     | 48.9 (9.2)       | -15.9 (14.4)                                   |
| Conners' global index              | 73.6 (13.3)     | 52.1 (10.2)      | -21.5 (12.2)                                   |
| Inattentive                        | 73.8 (12.6)     | 53.8 (11.1)      | -20.0 (11.9)                                   |
| Hyperactive/Impulsive              | 78.0 (14.4)     | 54.3 (10.3)      | -23.7 (15.0)                                   |
| DSM-IV                             | 77.8 (12.0)     | 54.3 (10.7)      | -23.4 (12.8)                                   |

ADHD, attention-deficit/hyperactivity disorder; CPRS, Conners' Parent Rating Scale; DSM-IV, *Diagnostic and Statistical Manual of Mental Disorders*, Fourth Edition; OL, open label; SD, standard deviation.
